# Supplementary material for: Interfacial engineering of a zinc blende/wurtzite homojunction photocatalyst through hybridization with a cobalt phosphide co-catalyst for enhanced visible-light-driven photocatalytic H2 evolution
Source: Royal Society of Chemistry journal article supplement (doi:10.1039/c9se00800d), 2020-01-01
Supplement: c9se00800d1.pdf [file c9se00800d1.pdf]

## Supporting Information

# Interfacial Engineering of Zinc Blende/Wurtzite Homojunction Photocatalyst through Hybridization with Cobalt Phosphide Co-catalyst for Enhanced Visible-Light-Driven Photocatalytic H<sub>2</sub> Evolution

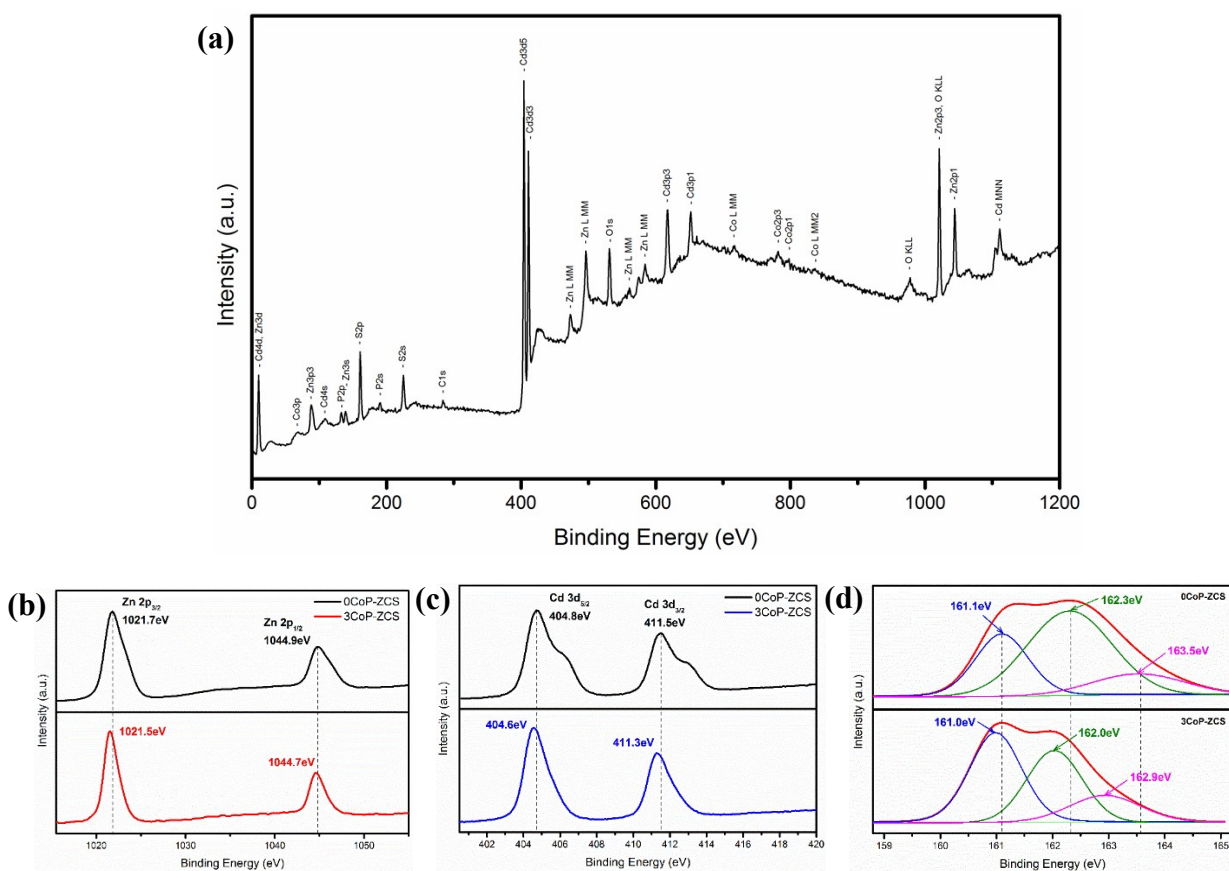

**Fig. S1** (a) Full XPS spectra of 3CoP-ZCS.

High resolution XPS spectra of (b) Zn 2p (c) Cd 3d (d) S 2p of 3CoP-ZCS.

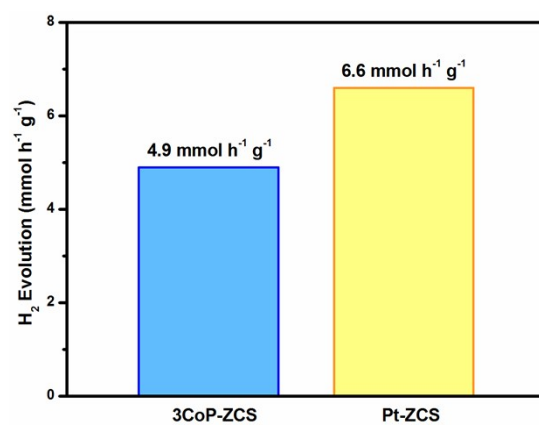

**Fig. S2** Photocatalytic H<sub>2</sub> evolution activity comparison between 3CoP-ZCS and Pt-ZCS.

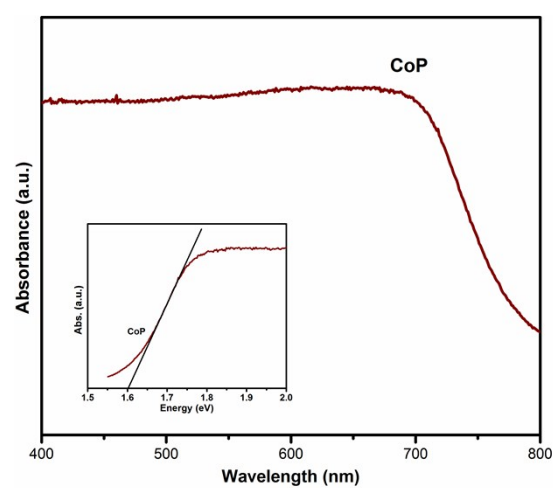

**Fig. S3** UV-vis DRS spectra of CoP (Inset: Tauc plot of CoP).

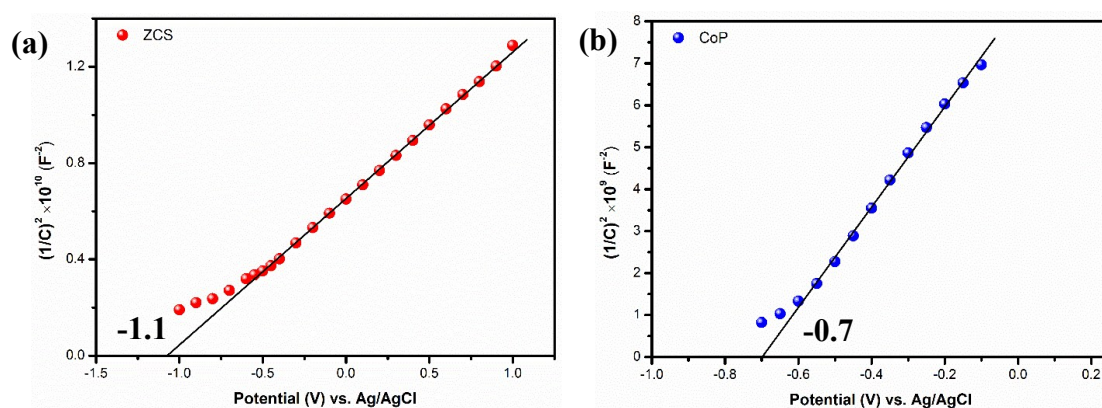

**Fig. S4** Mott-Schottky plot of (a) ZCS (b) CoP.
